# Supplementary material for: Attitudes and perceptions of mothers towards childhood vaccination in Greece: lessons to improve the childhood COVID-19 vaccination acceptance
Source: PubMed Central journal article supplement (PMC9453258; doi:10.3389/fped.2022.951039), 2022-08-25
Supplement: Image_1.pdf [file Image_1.pdf]

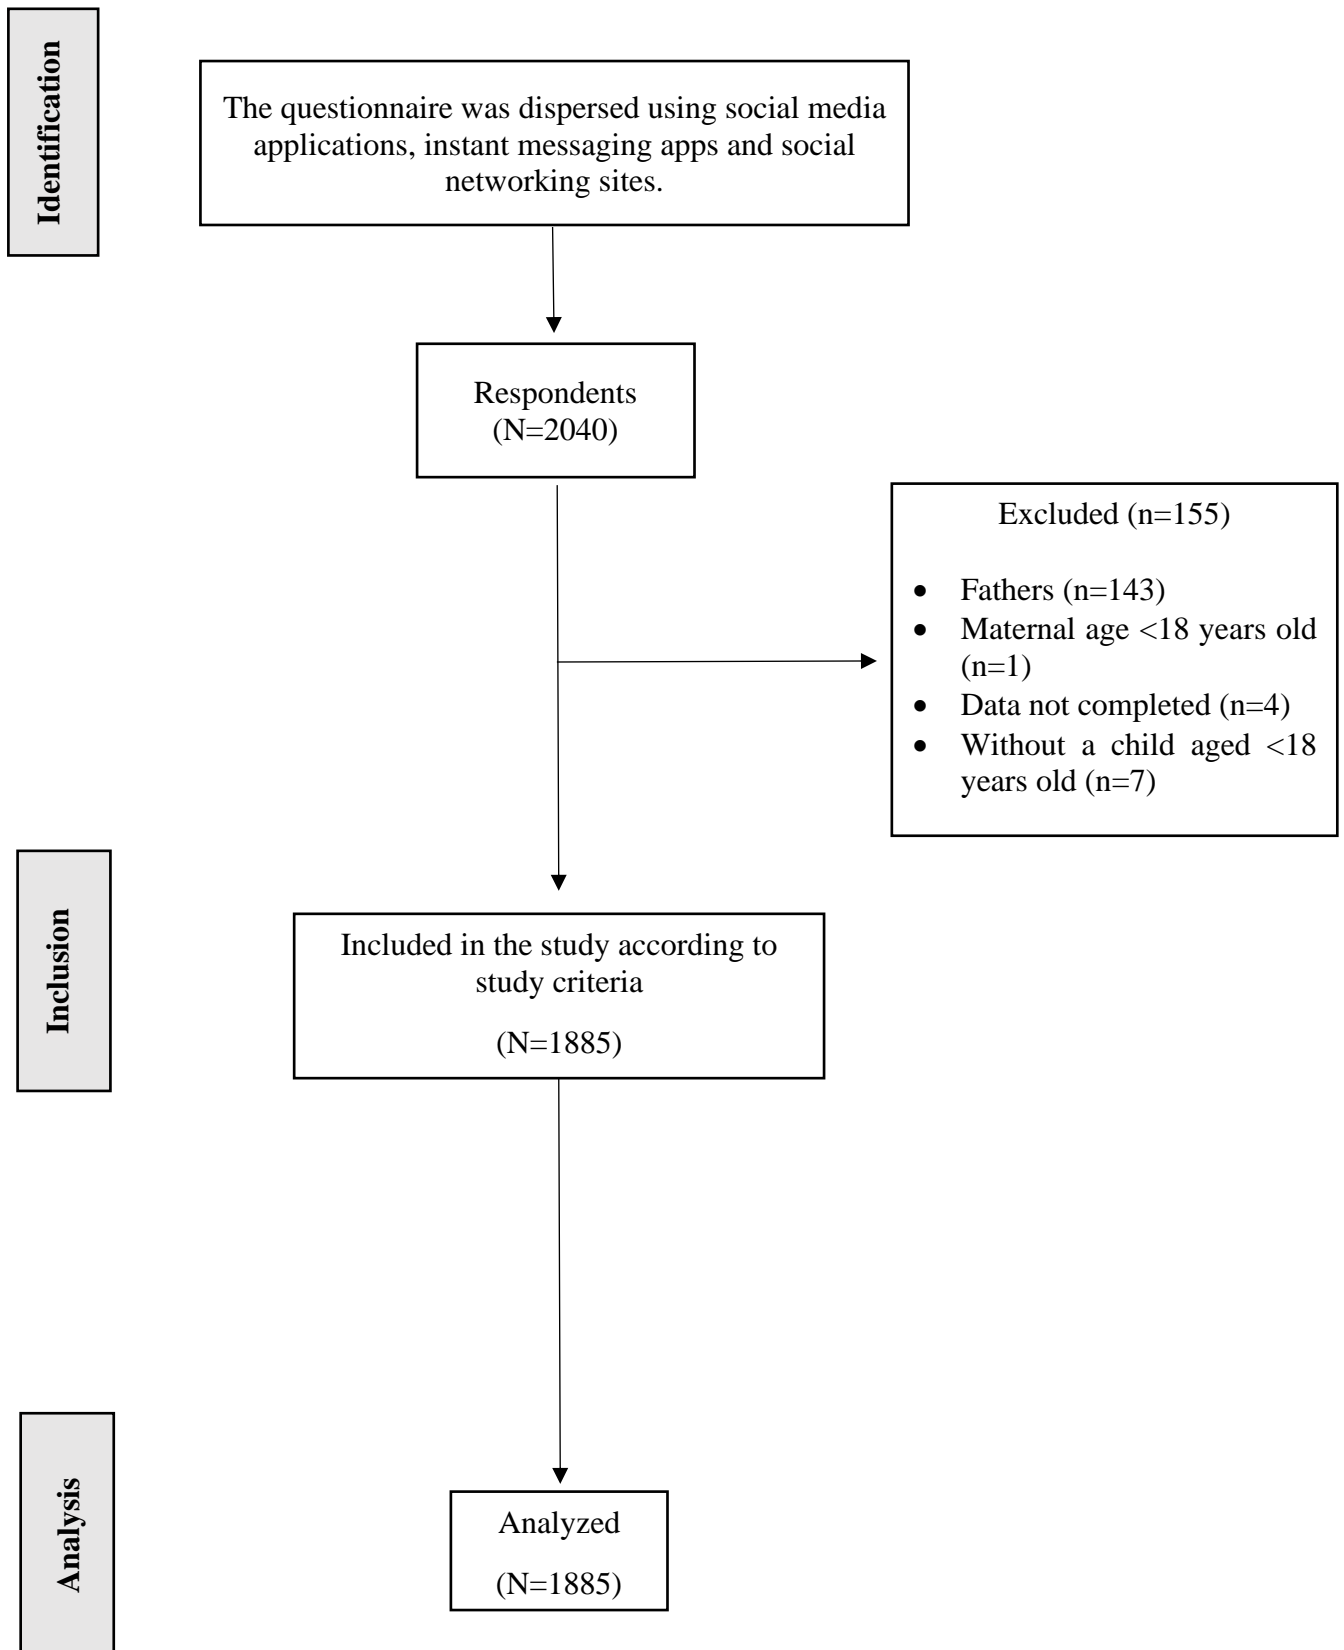

**Supplementary Figure 1.** Study flow diagram
