# Supplementary material for: Attitudes and perceptions of mothers towards childhood vaccination in Greece: lessons to improve the childhood COVID-19 vaccination acceptance
Source: PubMed Central journal article supplement (PMC9453258; doi:10.3389/fped.2022.951039), 2022-08-25
Supplement: Table_1.pdf [file Table_1.pdf]

| <b>Supplementary Table 1. Maternal responses to questions about vaccination attitudes by age of mother and their child/children.</b> |                           |                            |                              |                            |
|--------------------------------------------------------------------------------------------------------------------------------------|---------------------------|----------------------------|------------------------------|----------------------------|
|                                                                                                                                      | <b>Age of mother (SD)</b> | <b>p-value<sup>a</sup></b> | <b>Age of children (IQR)</b> | <b>p-value<sup>b</sup></b> |
| <b>Q1. All vaccinations provided by the National Vaccination Program must be offered to our children.</b>                            |                           |                            |                              |                            |
| D                                                                                                                                    | 36.5 (5.6)                |                            | 48 (24-75)                   |                            |
| N                                                                                                                                    | 36.4 (5.4)                | 0.89                       | 48 (30-72)                   | 0.68                       |
| A                                                                                                                                    | 36.3 (5.0)                |                            | 48 (24-72)                   |                            |
| <b>Q2. All vaccines are safe.</b>                                                                                                    |                           |                            |                              |                            |
| D                                                                                                                                    | 36.5 (5.4)                |                            | 48 (24-72)                   |                            |
| N                                                                                                                                    | 35.7 (5.3)                | <0.01                      | 48 (24-72)                   | 0.55                       |
| A                                                                                                                                    | 36.6 (4.7)                |                            | 48 (24-72)                   |                            |
| <b>Q3. Vaccines protect children from serious and life-threatening diseases.</b>                                                     |                           |                            |                              |                            |
| D                                                                                                                                    | 35.6 (5.7)                |                            | 39 (24-72)                   |                            |
| N                                                                                                                                    | 35.6 (6.2)                | 0.20                       | 48 (30-84)                   | 0.49                       |
| A                                                                                                                                    | 36.3 (4.9)                |                            | 48 (24-72)                   |                            |
| <b>Q4. Vaccination in childhood protects for a lifetime.</b>                                                                         |                           |                            |                              |                            |
| D                                                                                                                                    | 35.8 (5.0)                |                            | 48 (24-72)                   |                            |
| N                                                                                                                                    | 36.2 (4.8)                | 0.03                       | 48 (24-72)                   | 0.86                       |
| A                                                                                                                                    | 36.6 (5.2)                |                            | 48 (24-72)                   |                            |
| <b>Q5. A vaccine always provides protection to a child.</b>                                                                          |                           |                            |                              |                            |
| D                                                                                                                                    | 35.5 (5.0)                |                            | 48 (24-72)                   |                            |
| N                                                                                                                                    | 35.9 (5.0)                | <0.01                      | 48 (24-72)                   | 0.81                       |
| A                                                                                                                                    | 36.9 (5.0)                |                            | 48 (24-72)                   |                            |
| <b>Q6. There are possible side effects from some vaccines.</b>                                                                       |                           |                            |                              |                            |
| D                                                                                                                                    | 38.5 (4.4)                |                            | 42 (24-72)                   |                            |
| N                                                                                                                                    | 36.6 (5.7)                | 0.01                       | 48 (24-72)                   | 0.44                       |
| A                                                                                                                                    | 36.2 (5.0)                |                            | 48 (24-72)                   |                            |
| <b>Q7. Vaccines can cause long-term problems in children.</b>                                                                        |                           |                            |                              |                            |
| D                                                                                                                                    | 36.3 (5.0)                |                            | 48 (24-72)                   |                            |
| N                                                                                                                                    | 36.2 (5.0)                | 0.97                       | 48 (24-72)                   | 0.87                       |
| A                                                                                                                                    | 36.3 (5.5)                |                            | 48 (24-72)                   |                            |
| <b>Q8. The benefits of vaccination outweigh the potential risks.</b>                                                                 |                           |                            |                              |                            |
| D                                                                                                                                    | 36.6 (5.8)                |                            | 48 (30-72)                   |                            |
| N                                                                                                                                    | 36.2 (5.9)                | 0.89                       | 39 (24-72)                   | 0.67                       |
| A                                                                                                                                    | 36.3 (4.9)                |                            | 48 (24-72)                   |                            |
| <b>Q9. Large number of vaccines can adversely affect the immune system of children.</b>                                              |                           |                            |                              |                            |
| D                                                                                                                                    | 36.3 (5.0)                |                            | 48 (24-72)                   |                            |
| N                                                                                                                                    | 36.2 (4.9)                | 0.89                       | 48 (24-72)                   | 0.64                       |
| A                                                                                                                                    | 36.4 (5.9)                |                            | 36 (24-72)                   |                            |
| <b>Q10. Children should be vaccinated immediately after the release of a new vaccine.</b>                                            |                           |                            |                              |                            |
| D                                                                                                                                    | 35.9 (5.1)                |                            | 48 (24-72)                   |                            |
| N                                                                                                                                    | 36.7 (4.8)                | <0.01                      | 48 (24-72)                   | 0.64                       |

|                                                                           |            |             |              |             |
|---------------------------------------------------------------------------|------------|-------------|--------------|-------------|
| A                                                                         | 37.4 (4.7) |             | 48 (24-72)   |             |
| <b>Q11. I doubt the safety and effectiveness of new vaccines.</b>         |            |             |              |             |
| D                                                                         | 36.8 (4.7) |             | 48 (24-72)   |             |
| N                                                                         | 36.2 (4.8) | <b>0.02</b> | 48 (24-72)   | <b>0.04</b> |
| A                                                                         | 35.9 (5.5) |             | 37.5 (24-69) |             |
| <b>Q12. I believe in the usefulness of vaccines.</b>                      |            |             |              |             |
| D                                                                         | 36.0 (5.6) |             | 42 (24-72)   |             |
| N                                                                         | 36.4 (6.0) | 0.94        | 48 (24-72)   | 0.85        |
| A                                                                         | 36.3 (5.0) |             | 48 (24-72)   |             |
| <b>Q13. Some vaccines are made for commercial purposes.</b>               |            |             |              |             |
| D                                                                         | 36.8 (4.6) |             | 48 (24-72)   |             |
| N                                                                         | 36.2 (5.0) | <b>0.02</b> | 48 (24-72)   | 0.06        |
| A                                                                         | 36.0 (5.3) |             | 42 (24-72)   |             |
| <b>Q14. I think natural childhood illness is better than vaccination.</b> |            |             |              |             |
| D                                                                         | 36.3 (4.9) |             | 48 (24-72)   |             |
| N                                                                         | 36.0 (5.4) | 0.06        | 42 (24-72)   | 0.40        |
| A                                                                         | 37.2 (5.6) |             | 48 (24-72)   |             |

Abbreviations: D, absolutely disagree/disagree; N, neither disagree nor agree; A, agree/absolutely agree; SD, standard deviation; IQR, interquartile range; <sup>a</sup> One-way analysis of variance (ANOVA); <sup>b</sup> Kruskal–Wallis rank test; Bold font indicates statistical significance after a Bonferroni correction ( $p < 0.05$ ).
