# Supplementary material for: Attitudes and perceptions of mothers towards childhood vaccination in Greece: lessons to improve the childhood COVID-19 vaccination acceptance
Source: PubMed Central journal article supplement (PMC9453258; doi:10.3389/fped.2022.951039), 2022-08-25
Supplement: Table_2.pdf [file Table_2.pdf]

**Supplementary Table 2.** Maternal responses to questions about vaccination attitudes by geographical region and area of residence

|                                                                                                           | Geographical region of residence |            |                |              |                      | p-value <sup>a</sup> | Area of residence |             |            | p-value <sup>a</sup> |
|-----------------------------------------------------------------------------------------------------------|----------------------------------|------------|----------------|--------------|----------------------|----------------------|-------------------|-------------|------------|----------------------|
|                                                                                                           | Total                            | Attica     | Central Greece | North Greece | Crete/Aegean Islands |                      | Total             | Urban       | Rural      |                      |
| <b>Q1. All vaccinations provided by the National Vaccination Program must be offered to our children.</b> |                                  |            |                |              |                      |                      |                   |             |            |                      |
| <b>D</b>                                                                                                  | 80 (4.3)                         | 39 (4.4)   | 12 (4.9)       | 20 (3.7)     | 9 (4.3)              |                      | 79 (4.4)          | 69 (4.4)    | 10 (4.3)   |                      |
| <b>N</b>                                                                                                  | 102 (5.4)                        | 45 (5.1)   | 14 (5.7)       | 35 (6.4)     | 8 (3.8)              | 0.80                 | 97 (5.3)          | 84 (5.3)    | 13 (5.5)   | 1.00                 |
| <b>A</b>                                                                                                  | 1703 (90.3)                      | 799 (90.5) | 219 (89.4)     | 491 (89.9)   | 194 (91.9)           |                      | 1636 (90.3)       | 1424 (90.3) | 212 (90.2) |                      |
| <b>Q2. All vaccines are safe.</b>                                                                         |                                  |            |                |              |                      |                      |                   |             |            |                      |
| <b>D</b>                                                                                                  | 224 (11.9)                       | 104 (11.8) | 35 (14.3)      | 66 (12.1)    | 19 (9.0)             |                      | 218 (12.0)        | 189 (12.0)  | 29 (12.4)  |                      |
| <b>N</b>                                                                                                  | 669 (35.5)                       | 285 (32.3) | 93 (37.9)      | 208 (38.2)   | 83 (39.3)            | 0.07                 | 645 (35.6)        | 547 (34.7)  | 98 (41.9)  | 0.07                 |
| <b>A</b>                                                                                                  | 991 (52.6)                       | 494 (55.9) | 117 (47.8)     | 271 (49.7)   | 109 (51.7)           |                      | 948 (52.4)        | 841 (53.3)  | 107 (45.7) |                      |
| <b>Q3. Vaccines protect children from serious and life-threatening diseases.</b>                          |                                  |            |                |              |                      |                      |                   |             |            |                      |
| <b>D</b>                                                                                                  | 40 (2.1)                         | 15 (1.7)   | 8 (3.3)        | 9 (1.6)      | 8 (3.8)              |                      | 39 (2.1)          | 33 (2.1)    | 6 (2.6)    |                      |
| <b>N</b>                                                                                                  | 116 (6.2)                        | 44 (5.0)   | 15 (6.1)       | 44 (8.1)     | 13 (6.2)             | 0.08                 | 112 (6.2)         | 97 (6.1)    | 15 (6.4)   | 0.89                 |
| <b>A</b>                                                                                                  | 1727 (91.7)                      | 822 (93.3) | 222 (90.6)     | 493 (90.3)   | 190 (90.0)           |                      | 1659 (91.7)       | 1446 (91.8) | 213 (91.0) |                      |
| <b>Q4. Vaccination in childhood protects for a lifetime.</b>                                              |                                  |            |                |              |                      |                      |                   |             |            |                      |
| <b>D</b>                                                                                                  | 406 (21.5)                       | 200 (22.7) | 50 (20.4)      | 116 (21.2)   | 40 (18.9)            |                      | 394 (21.8)        | 354 (22.5)  | 40 (17.0)  |                      |
| <b>N</b>                                                                                                  | 572 (30.4)                       | 258 (29.3) | 72 (29.4)      | 160 (29.3)   | 82 (38.9)            | 0.17                 | 542 (29.9)        | 471 (29.9)  | 71 (30.2)  | 0.14                 |
| <b>A</b>                                                                                                  | 905 (48.1)                       | 423 (48.0) | 123 (50.2)     | 270 (49.5)   | 89 (42.2)            |                      | 874 (48.3)        | 750 (47.6)  | 124 (52.8) |                      |
| <b>Q5. A vaccine always provides protection to a child.</b>                                               |                                  |            |                |              |                      |                      |                   |             |            |                      |
| <b>D</b>                                                                                                  | 390 (20.7)                       | 173 (19.6) | 55 (22.4)      | 118 (21.6)   | 44 (20.9)            |                      | 377 (20.8)        | 335 (21.3)  | 42 (17.9)  |                      |
| <b>N</b>                                                                                                  | 554 (29.4)                       | 248 (28.1) | 71 (29.0)      | 158 (29.0)   | 77 (36.7)            | 0.17                 | 530 (29.3)        | 456 (28.9)  | 74 (31.5)  | 0.45                 |
| <b>A</b>                                                                                                  | 939 (49.9)                       | 462 (52.3) | 119 (48.6)     | 269 (49.4)   | 89 (42.4)            |                      | 903 (49.9)        | 784 (49.8)  | 119 (50.6) |                      |
| <b>Q6. There are possible side effects from some vaccines.</b>                                            |                                  |            |                |              |                      |                      |                   |             |            |                      |
| <b>D</b>                                                                                                  | 37 (2.0)                         | 13 (1.5)   | 8 (3.3)        | 10 (1.8)     | 6 (2.8)              |                      | 32 (1.8)          | 28 (1.8)    | 4 (1.7)    |                      |
| <b>N</b>                                                                                                  | 208 (11.0)                       | 109 (12.3) | 24 (9.8)       | 55 (10.1)    | 20 (9.5)             | 0.33                 | 202 (11.1)        | 175 (11.1)  | 27 (11.5)  | 0.98                 |
| <b>A</b>                                                                                                  | 1640 (87.0)                      | 761 (86.2) | 213 (86.9)     | 481 (88.1)   | 185 (87.7)           |                      | 1578 (87.1)       | 1374 (87.1) | 204 (86.8) |                      |
| <b>Q7. Vaccines can cause long-term problems in children.</b>                                             |                                  |            |                |              |                      |                      |                   |             |            |                      |
| <b>D</b>                                                                                                  | 929 (49.3)                       | 474 (53.7) | 112 (45.7)     | 247 (45.2)   | 96 (45.5)            |                      | 888 (49.0)        | 787 (49.9)  | 101 (43.0) |                      |
| <b>N</b>                                                                                                  | 765 (40.6)                       | 328 (37.1) | 106 (43.3)     | 238 (43.6)   | 93 (44.1)            | <b>0.04</b>          | 739 (40.8)        | 632 (40.1)  | 107 (45.5) | 0.14                 |
| <b>A</b>                                                                                                  | 191 (10.1)                       | 81 (9.2)   | 27 (11.0)      | 61 (11.2)    | 22 (10.4)            |                      | 185 (10.2)        | 158 (10.0)  | 27 (11.5)  |                      |
| <b>Q8. The benefits of vaccination outweigh the potential risks.</b>                                      |                                  |            |                |              |                      |                      |                   |             |            |                      |
| <b>D</b>                                                                                                  | 49 (2.6)                         | 25 (2.8)   | 6 (2.4)        | 10 (1.8)     | 8 (3.8)              |                      | 48 (2.6)          | 44 (2.8)    | 4 (1.7)    |                      |
| <b>N</b>                                                                                                  | 155 (8.2)                        | 71 (8.1)   | 18 (7.4)       | 49 (9.0)     | 17 (8.1)             | 0.77                 | 150 (8.3)         | 128 (8.1)   | 22 (9.4)   | 0.52                 |
| <b>A</b>                                                                                                  | 1680 (89.2)                      | 787 (89.1) | 221 (90.2)     | 487 (89.2)   | 185 (88.1)           |                      | 1613 (89.1)       | 1404 (89.1) | 209 (88.9) |                      |
| <b>Q9. Large number of vaccines can adversely affect the immune system of children.</b>                   |                                  |            |                |              |                      |                      |                   |             |            |                      |
| <b>D</b>                                                                                                  | 1160 (61.7)                      | 564 (64.0) | 155 (63.5)     | 325 (59.5)   | 116 (55.0)           |                      | 1114 (61.6)       | 976 (62.0)  | 138 (58.7) |                      |
| <b>N</b>                                                                                                  | 554 (29.4)                       | 244 (27.7) | 66 (27.1)      | 166 (30.4)   | 78 (36.9)            | 0.13                 | 531 (29.3)        | 455 (28.9)  | 76 (32.4)  | 0.55                 |
| <b>A</b>                                                                                                  | 168 (8.9)                        | 73 (8.3)   | 23 (9.4)       | 55 (10.1)    | 17 (8.1)             |                      | 164 (9.1)         | 143 (9.1)   | 21 (8.9)   |                      |
| <b>Q10. Children should be vaccinated immediately after the release of a new vaccine.</b>                 |                                  |            |                |              |                      |                      |                   |             |            |                      |
| <b>D</b>                                                                                                  | 1151 (61.2)                      | 512 (58.1) | 165 (67.3)     | 335 (61.6)   | 139 (65.9)           | 0.12                 | 1108 (61.3)       | 950 (60.4)  | 158 (67.2) | <b>0.03</b>          |

|                                                                           |             |            |            |            |            |             |             |             |            |      |
|---------------------------------------------------------------------------|-------------|------------|------------|------------|------------|-------------|-------------|-------------|------------|------|
| <b>N</b>                                                                  | 637 (33.9)  | 321 (36.4) | 71 (29.0)  | 184 (33.8) | 61 (28.9)  |             | 612 (33.8)  | 550 (35.0)  | 62 (26.4)  |      |
| <b>A</b>                                                                  | 93 (4.9)    | 48 (5.5)   | 9 (3.7)    | 25 (4.6)   | 11 (5.2)   |             | 88 (4.9)    | 73 (4.6)    | 15 (6.4)   |      |
| <b>Q11. I doubt the safety and effectiveness of new vaccines.</b>         |             |            |            |            |            |             |             |             |            |      |
| <b>D</b>                                                                  | 441 (23.4)  | 220 (24.9) | 51 (20.8)  | 124 (22.7) | 46 (21.8)  |             | 421 (23.3)  | 373 (23.7)  | 48 (20.4)  |      |
| <b>N</b>                                                                  | 895 (47.5)  | 422 (47.9) | 105 (42.9) | 260 (47.6) | 108 (51.2) | 0.15        | 864 (47.7)  | 748 (47.4)  | 116 (49.4) | 0.55 |
| <b>A</b>                                                                  | 548 (29.1)  | 240 (27.2) | 89 (36.3)  | 162 (29.7) | 57 (27.0)  |             | 526 (29.0)  | 455 (28.9)  | 71 (30.2)  |      |
| <b>Q12. I believe in the usefulness of vaccines.</b>                      |             |            |            |            |            |             |             |             |            |      |
| <b>D</b>                                                                  | 41 (2.2)    | 14 (1.6)   | 10 (4.1)   | 9 (1.7)    | 8 (3.8)    |             | 40 (2.2)    | 35 (2.2)    | 5 (2.1)    |      |
| <b>N</b>                                                                  | 114 (6.0)   | 48 (5.4)   | 11 (4.5)   | 40 (7.3)   | 15 (7.1)   | 0.05        | 109 (6.0)   | 92 (5.8)    | 17 (7.2)   | 0.70 |
| <b>A</b>                                                                  | 1728 (91.8) | 820 (93.0) | 224 (91.4) | 496 (91.0) | 188 (89.1) |             | 1661 (91.8) | 1448 (92.0) | 213 (90.7) |      |
| <b>Q13. Some vaccines are made for commercial purposes.</b>               |             |            |            |            |            |             |             |             |            |      |
| <b>D</b>                                                                  | 465 (24.7)  | 248 (28.1) | 57 (23.2)  | 120 (22.0) | 40 (19.0)  |             | 449 (24.8)  | 398 (25.3)  | 51 (21.7)  |      |
| <b>N</b>                                                                  | 747 (39.7)  | 337 (38.3) | 94 (38.4)  | 216 (39.6) | 100 (47.4) | <b>0.02</b> | 716 (39.6)  | 620 (39.4)  | 96 (40.8)  | 0.49 |
| <b>A</b>                                                                  | 671 (35.6)  | 296 (33.6) | 94 (38.4)  | 210 (38.4) | 71 (33.6)  |             | 645 (35.6)  | 557 (35.3)  | 88 (37.5)  |      |
| <b>Q14. I think natural childhood illness is better than vaccination.</b> |             |            |            |            |            |             |             |             |            |      |
| <b>D</b>                                                                  | 1355 (72.0) | 658 (74.5) | 175 (72.0) | 381 (69.9) | 141 (66.8) |             | 1306 (72.2) | 1152 (73.2) | 154 (65.5) |      |
| <b>N</b>                                                                  | 404 (21.5)  | 171 (19.4) | 50 (20.6)  | 129 (23.7) | 54 (25.6)  | 0.27        | 382 (21.1)  | 321 (20.4)  | 61 (26.0)  | 0.05 |
| <b>A</b>                                                                  | 123 (6.5)   | 54 (6.1)   | 18 (7.4)   | 35 (6.4)   | 16 (7.6)   |             | 121 (6.7)   | 101 (6.4)   | 20 (8.5)   |      |

Abbreviations: D, absolutely disagree/disagree; N, neither disagree nor agree; A, agree/absolutely agree; <sup>a</sup>Differences were tested using chi2 test; Bold font indicates statistical significance after a Bonferroni correction (p<0.05).
