# Supplementary material for: Attitudes and perceptions of mothers towards childhood vaccination in Greece: lessons to improve the childhood COVID-19 vaccination acceptance
Source: PubMed Central journal article supplement (PMC9453258; doi:10.3389/fped.2022.951039), 2022-08-25
Supplement: Table_3.pdf [file Table_3.pdf]

**Supplementary Table 3.** Maternal responses to questions about vaccination attitudes by questions related to previous vaccination behaviors.

|                                                                                                           | Do you strictly adhere to the prescribed dosage as indicated by the local recommendations for each vaccine? |            |             |                      | Have you ever delayed your child/children vaccination? |            |            |                      | Have you vaccinated during your pregnancy? |             |            |                      |
|-----------------------------------------------------------------------------------------------------------|-------------------------------------------------------------------------------------------------------------|------------|-------------|----------------------|--------------------------------------------------------|------------|------------|----------------------|--------------------------------------------|-------------|------------|----------------------|
|                                                                                                           | Total                                                                                                       | No         | Yes         | p-value <sup>a</sup> | Total                                                  | No         | Yes        | p-value <sup>a</sup> | Total                                      | No          | Yes        | p-value <sup>a</sup> |
| <b>Q1. All vaccinations provided by the National Vaccination Program must be offered to our children.</b> |                                                                                                             |            |             |                      |                                                        |            |            |                      |                                            |             |            |                      |
| D                                                                                                         | 76 (4.0)                                                                                                    | 57 (53.3)  | 19 (1.1)    | <0.01                | 75 (4.0)                                               | 14 (1.5)   | 61 (6.3)   | <0.01                | 80 (4.3)                                   | 78 (5.5)    | 2 (0.4)    | <0.01                |
| N                                                                                                         | 101 (5.4)                                                                                                   | 28 (26.2)  | 73 (4.1)    |                      | 101 (5.4)                                              | 27 (3.0)   | 74 (7.7)   |                      | 102 (5.4)                                  | 92 (6.5)    | 10 (2.2)   |                      |
| A                                                                                                         | 1700 (90.6)                                                                                                 | 22 (20.5)  | 1678 (94.8) |                      | 1700 (90.6)                                            | 869 (95.5) | 831 (86.0) |                      | 1697 (90.3)                                | 1253 (88.0) | 444 (97.4) |                      |
| <b>Q2. All vaccines are safe.</b>                                                                         |                                                                                                             |            |             |                      |                                                        |            |            |                      |                                            |             |            |                      |
| D                                                                                                         | 218 (11.6)                                                                                                  | 87 (81.3)  | 131 (7.4)   | <0.01                | 218 (11.6)                                             | 59 (6.5)   | 159 (16.5) | <0.01                | 223 (11.9)                                 | 203 (14.3)  | 20 (4.4)   | <0.01                |
| N                                                                                                         | 668 (35.6)                                                                                                  | 17 (15.9)  | 651 (36.8)  |                      | 668 (35.6)                                             | 317 (34.9) | 351 (36.3) |                      | 668 (35.6)                                 | 538 (37.8)  | 130 (28.6) |                      |
| A                                                                                                         | 990 (52.8)                                                                                                  | 3 (2.8)    | 987 (55.8)  |                      | 989 (52.8)                                             | 533 (58.6) | 456 (47.2) |                      | 987 (52.5)                                 | 682 (47.9)  | 305 (67.0) |                      |
| <b>Q3. Vaccines protect children from serious and life-threatening diseases.</b>                          |                                                                                                             |            |             |                      |                                                        |            |            |                      |                                            |             |            |                      |
| D                                                                                                         | 36 (1.9)                                                                                                    | 27 (25.2)  | 9 (0.5)     | <0.01                | 36 (1.9)                                               | 7 (0.8)    | 29 (3.0)   | <0.01                | 40 (2.1)                                   | 39 (2.7)    | 1 (0.2)    | <0.01                |
| N                                                                                                         | 114 (6.1)                                                                                                   | 35 (32.7)  | 79 (4.5)    |                      | 115 (6.1)                                              | 30 (3.3)   | 85 (8.8)   |                      | 116 (6.2)                                  | 108 (7.6)   | 8 (1.8)    |                      |
| A                                                                                                         | 1725 (92.0)                                                                                                 | 45 (42.1)  | 1680 (95.0) |                      | 1723 (92.0)                                            | 871 (95.9) | 852 (88.2) |                      | 1721 (91.7)                                | 1274 (89.7) | 447 (98.0) |                      |
| <b>Q4. Vaccination in childhood protects for a lifetime.</b>                                              |                                                                                                             |            |             |                      |                                                        |            |            |                      |                                            |             |            |                      |
| D                                                                                                         | 401 (21.4)                                                                                                  | 69 (64.5)  | 332 (18.8)  | <0.01                | 400 (21.3)                                             | 148 (16.3) | 252 (26.1) | <0.01                | 404 (21.5)                                 | 319 (22.5)  | 85 (18.6)  | 0.16                 |
| N                                                                                                         | 570 (30.4)                                                                                                  | 33 (30.8)  | 537 (30.4)  |                      | 571 (30.5)                                             | 270 (29.7) | 301 (31.2) |                      | 571 (30.4)                                 | 434 (30.5)  | 137 (30.1) |                      |
| A                                                                                                         | 904 (48.2)                                                                                                  | 5 (4.7)    | 899 (50.8)  |                      | 903 (48.2)                                             | 491 (54.0) | 412 (42.7) |                      | 902 (48.1)                                 | 668 (47.0)  | 234 (51.3) |                      |
| <b>Q5. A vaccine always provides protection to a child.</b>                                               |                                                                                                             |            |             |                      |                                                        |            |            |                      |                                            |             |            |                      |
| D                                                                                                         | 384 (20.5)                                                                                                  | 80 (74.8)  | 304 (17.2)  | <0.01                | 384 (20.5)                                             | 144 (15.8) | 240 (24.9) | <0.01                | 389 (20.7)                                 | 311 (21.9)  | 78 (17.1)  | 0.02                 |
| N                                                                                                         | 552 (29.4)                                                                                                  | 23 (21.5)  | 529 (29.9)  |                      | 553 (29.5)                                             | 254 (27.9) | 299 (31.0) |                      | 552 (29.4)                                 | 427 (30.0)  | 125 (27.4) |                      |
| A                                                                                                         | 939 (52.1)                                                                                                  | 4 (3.7)    | 935 (52.9)  |                      | 937 (50.0)                                             | 511 (56.3) | 426 (44.1) |                      | 936 (49.9)                                 | 683 (48.1)  | 253 (55.5) |                      |
| <b>Q6. There are possible side effects from some vaccines.</b>                                            |                                                                                                             |            |             |                      |                                                        |            |            |                      |                                            |             |            |                      |
| D                                                                                                         | 37 (2.0)                                                                                                    | 0 (0.0)    | 37 (2.1)    | <0.01                | 37 (2.0)                                               | 24 (2.6)   | 13 (1.4)   | 0.03                 | 37 (2.0)                                   | 31 (2.2)    | 6 (1.3)    | 0.15                 |
| N                                                                                                         | 208 (11.1)                                                                                                  | 2 (1.9)    | 206 (11.6)  |                      | 208 (11.1)                                             | 112 (12.3) | 96 (9.9)   |                      | 208 (11.1)                                 | 148 (10.4)  | 60 (13.2)  |                      |
| A                                                                                                         | 1632 (86.9)                                                                                                 | 105 (98.1) | 1527 (86.3) |                      | 1631 (86.9)                                            | 774 (85.1) | 857 (88.7) |                      | 1634 (86.9)                                | 1244 (87.4) | 390 (85.5) |                      |
| <b>Q7. Vaccines can cause long-term problems in children.</b>                                             |                                                                                                             |            |             |                      |                                                        |            |            |                      |                                            |             |            |                      |
| D                                                                                                         | 929 (49.5)                                                                                                  | 3 (2.8)    | 926 (52.3)  | <0.01                | 928 (49.5)                                             | 502 (55.2) | 426 (44.1) | <0.01                | 924 (49.2)                                 | 656 (46.1)  | 268 (58.8) | <0.01                |
| N                                                                                                         | 762 (40.6)                                                                                                  | 21 (19.6)  | 741 (41.9)  |                      | 763 (40.7)                                             | 351 (38.6) | 412 (42.6) |                      | 764 (40.7)                                 | 596 (41.9)  | 168 (36.8) |                      |
| A                                                                                                         | 186 (9.9)                                                                                                   | 83 (77.6)  | 103 (5.8)   |                      | 185 (9.8)                                              | 57 (6.2)   | 128 (13.3) |                      | 191 (10.1)                                 | 171 (12.0)  | 20 (4.4)   |                      |
| <b>Q8. The benefits of vaccination outweigh the potential risks.</b>                                      |                                                                                                             |            |             |                      |                                                        |            |            |                      |                                            |             |            |                      |
| D                                                                                                         | 46 (2.4)                                                                                                    | 34 (31.8)  | 12 (0.7)    | <0.01                | 45 (2.4)                                               | 7 (0.8)    | 38 (3.9)   | <0.01                | 49 (2.6)                                   | 46 (3.2)    | 3 (0.7)    | <0.01                |
| N                                                                                                         | 153 (8.2)                                                                                                   | 43 (40.2)  | 110 (6.2)   |                      | 153 (8.2)                                              | 52 (5.7)   | 101 (10.5) |                      | 155 (8.3)                                  | 138 (9.7)   | 17 (3.7)   |                      |
| A                                                                                                         | 1677 (89.4)                                                                                                 | 30 (28.0)  | 1647 (93.1) |                      | 1677 (89.4)                                            | 850 (93.5) | 827 (85.6) |                      | 1674 (89.1)                                | 1238 (87.1) | 436 (95.6) |                      |
| <b>Q9. Large number of vaccines can adversely affect the immune system of children.</b>                   |                                                                                                             |            |             |                      |                                                        |            |            |                      |                                            |             |            |                      |
| D                                                                                                         | 1159 (61.8)                                                                                                 | 8 (7.5)    | 1151 (65.1) | <0.01                | 1158 (61.8)                                            | 612 (67.3) | 546 (56.6) | <0.01                | 1155 (61.6)                                | 826 (58.1)  | 329 (72.5) | <0.01                |

|                                                                                           |             |            |             |                 |             |            |            |                 |             |             |            |                 |
|-------------------------------------------------------------------------------------------|-------------|------------|-------------|-----------------|-------------|------------|------------|-----------------|-------------|-------------|------------|-----------------|
| <b>N</b>                                                                                  | 552 (29.5)  | 20 (18.7)  | 532 (30.1)  |                 | 554 (29.6)  | 257 (28.3) | 297 (30.8) |                 | 554 (29.5)  | 444 (31.2)  | 110 (24.2) |                 |
| <b>A</b>                                                                                  | 163 (8.7)   | 79 (73.8)  | 84 (4.8)    |                 | 161 (8.6)   | 40 (4.4)   | 121 (12.6) |                 | 167 (8.9)   | 152 (10.7)  | 15 (3.3)   |                 |
| <b>Q10. Children should be vaccinated immediately after the release of a new vaccine.</b> |             |            |             |                 |             |            |            |                 |             |             |            |                 |
| <b>D</b>                                                                                  | 1144 (61.0) | 105 (98.1) | 1039 (58.8) | <b>&lt;0.01</b> | 1144 (61.1) | 502 (55.4) | 642 (66.5) | <b>&lt;0.01</b> | 1147 (61.2) | 920 (64.8)  | 227 (49.8) | <b>&lt;0.01</b> |
| <b>N</b>                                                                                  | 636 (34.0)  | 2 (1.9)    | 634 (35.9)  |                 | 635 (33.9)  | 343 (37.8) | 292 (30.3) |                 | 635 (33.9)  | 446 (31.4)  | 189 (41.4) |                 |
| <b>A</b>                                                                                  | 93 (5.0)    | 0 (0.0)    | 93 (5.3)    |                 | 93 (5.0)    | 62 (6.8)   | 31 (3.2)   |                 | 93 (4.9)    | 53 (3.8)    | 40 (8.8)   |                 |
| <b>Q11. I doubt the safety and effectiveness of new vaccines.</b>                         |             |            |             |                 |             |            |            |                 |             |             |            |                 |
| <b>D</b>                                                                                  | 441 (23.5)  | 2 (1.9)    | 439 (24.8)  | <b>&lt;0.01</b> | 441 (23.5)  | 253 (27.8) | 188 (19.5) | <b>&lt;0.01</b> | 440 (23.4)  | 298 (21.0)  | 142 (31.1) | <b>&lt;0.01</b> |
| <b>N</b>                                                                                  | 893 (47.6)  | 16 (15.0)  | 877 (49.6)  |                 | 892 (47.6)  | 446 (49.1) | 446 (46.2) |                 | 891 (47.4)  | 663 (46.6)  | 228 (50.0) |                 |
| <b>A</b>                                                                                  | 542 (28.9)  | 89 (83.1)  | 453 (25.6)  |                 | 542 (28.9)  | 210 (23.1) | 332 (34.3) |                 | 547 (29.2)  | 461 (32.4)  | 86 (18.9)  |                 |
| <b>Q12. I believe in the usefulness of vaccines.</b>                                      |             |            |             |                 |             |            |            |                 |             |             |            |                 |
| <b>D</b>                                                                                  | 37 (2.0)    | 27 (25.2)  | 10 (0.6)    | <b>&lt;0.01</b> | 37 (2.0)    | 6 (0.7)    | 31 (3.2)   | <b>&lt;0.01</b> | 41 (2.2)    | 41 (2.9)    | 0 (0.0)    | <b>&lt;0.01</b> |
| <b>N</b>                                                                                  | 112 (6.0)   | 38 (35.5)  | 74 (4.2)    |                 | 113 (6.0)   | 34 (3.7)   | 79 (8.2)   |                 | 113 (6.0)   | 105 (7.4)   | 8 (1.7)    |                 |
| <b>A</b>                                                                                  | 1727 (92.0) | 42 (39.3)  | 1685 (95.2) |                 | 1724 (92.0) | 869 (95.6) | 855 (88.6) |                 | 1723 (91.8) | 1275 (89.7) | 448 (98.3) |                 |
| <b>Q13. Some vaccines are made for commercial purposes.</b>                               |             |            |             |                 |             |            |            |                 |             |             |            |                 |
| <b>D</b>                                                                                  | 465 (24.8)  | 1 (0.9)    | 464 (26.2)  | <b>&lt;0.01</b> | 463 (24.7)  | 260 (28.6) | 203 (21.0) | <b>&lt;0.01</b> | 464 (24.7)  | 315 (22.1)  | 149 (32.7) | <b>&lt;0.01</b> |
| <b>N</b>                                                                                  | 746 (39.8)  | 9 (8.4)    | 737 (41.7)  |                 | 746 (39.8)  | 370 (40.7) | 376 (39.0) |                 | 746 (39.7)  | 550 (38.7)  | 196 (43.0) |                 |
| <b>A</b>                                                                                  | 664 (35.4)  | 97 (90.7)  | 567 (32.1)  |                 | 665 (35.5)  | 279 (30.7) | 386 (40.0) |                 | 668 (35.6)  | 557 (39.2)  | 111 (24.3) |                 |
| <b>Q14. I think natural childhood illness is better than vaccination.</b>                 |             |            |             |                 |             |            |            |                 |             |             |            |                 |
| <b>D</b>                                                                                  | 1353 (72.2) | 12 (11.3)  | 1341 (75.8) | <b>&lt;0.01</b> | 1352 (72.2) | 685 (75.4) | 667 (69.2) | <b>&lt;0.01</b> | 1351 (72.0) | 980 (69.0)  | 371 (81.4) | <b>&lt;0.01</b> |
| <b>N</b>                                                                                  | 404 (21.6)  | 33 (31.1)  | 371 (21.0)  |                 | 403 (21.5)  | 191 (21.0) | 212 (22.0) |                 | 402 (21.4)  | 327 (23.0)  | 75 (16.4)  |                 |
| <b>A</b>                                                                                  | 117 (6.2)   | 61 (57.6)  | 56 (3.2)    |                 | 118 (6.3)   | 33 (3.6)   | 85 (8.8)   |                 | 123 (6.6)   | 113 (8.0)   | 10 (2.2)   |                 |

Abbreviations: D, absolutely disagree/disagree; N, neither disagree nor agree; A, agree/absolutely agree;<sup>a</sup>Differences were tested using chi2 test; Bold font indicates statistical significance after a Bonferroni correction (p<0.05).
